# Supplementary material for: Deuterium-Enriched Water Increases the Cytotoxicity of Cyclooxygenase Inhibitors in Hep-G2 Hepatocellular Carcinoma Cells; Involvement of MAPK Pathway and Apoptosis
Source: Preprints.org preprint supplement (doi:10.20944/preprints202305.2032.v1), 2023-05-30

**Supplementary figures**

**Figure S1:** The (normal) growth inhibitory effect of celecoxib (a) and indomethacin (b) on the Hep G2 cell line.

**
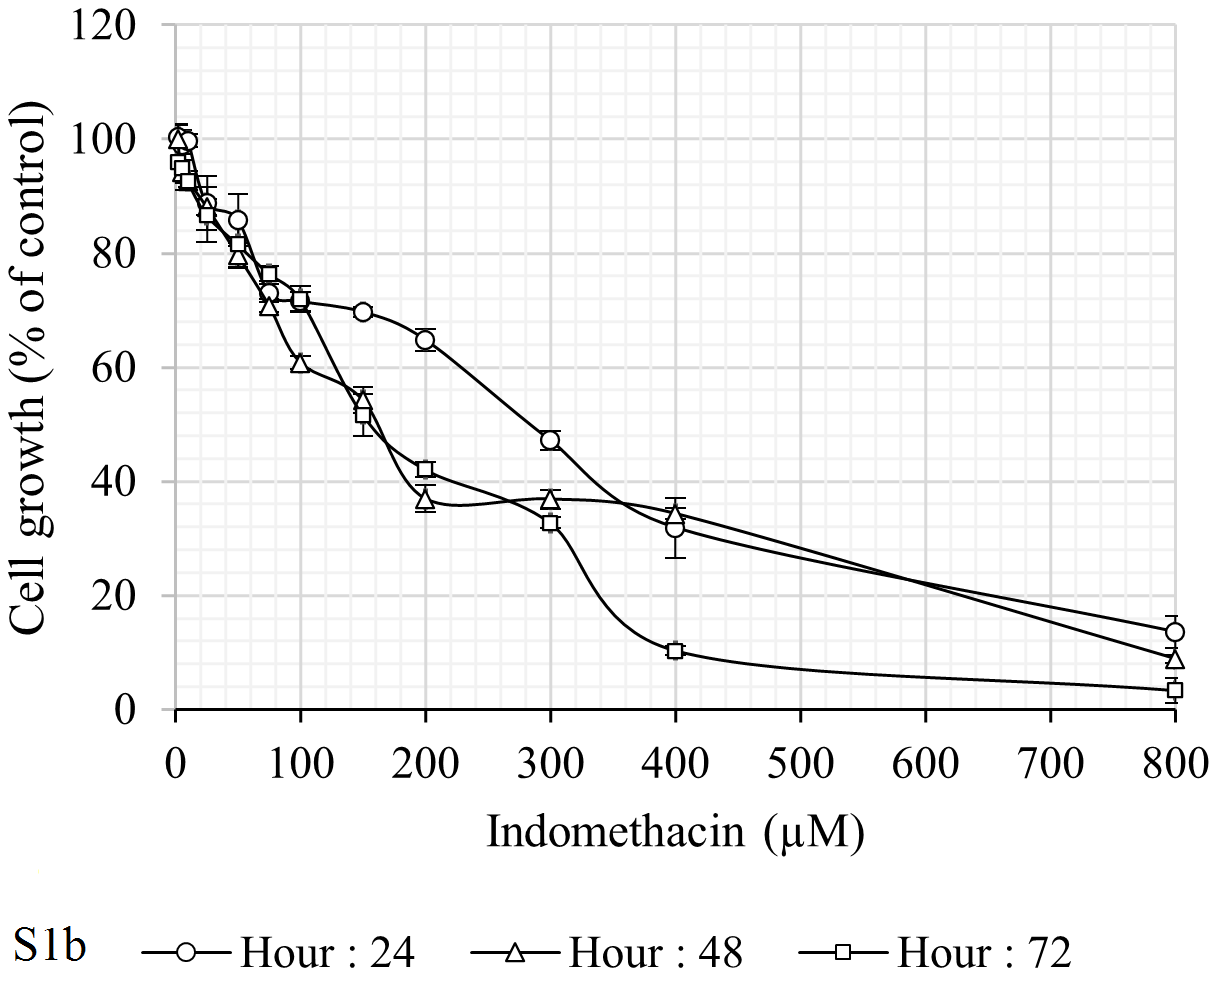

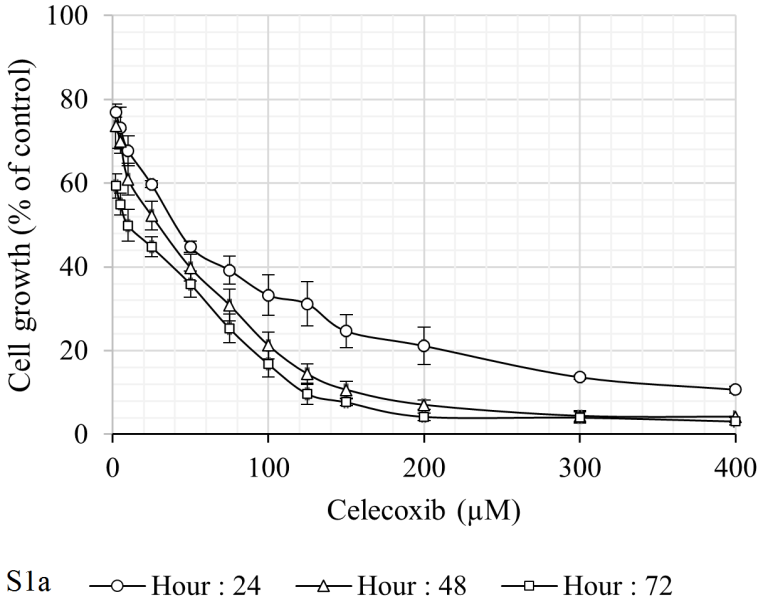
**

**Figure S2:** The (logarithmic) growth inhibitory effect of celecoxib in combination with DDWs and DEWs for 24 (a), 48 (b), and 72 (c) hours on the Hep G2 cell line.


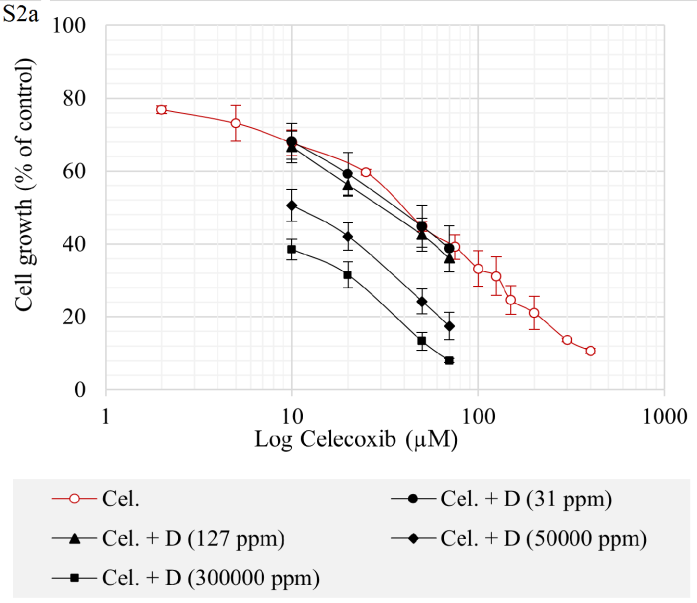

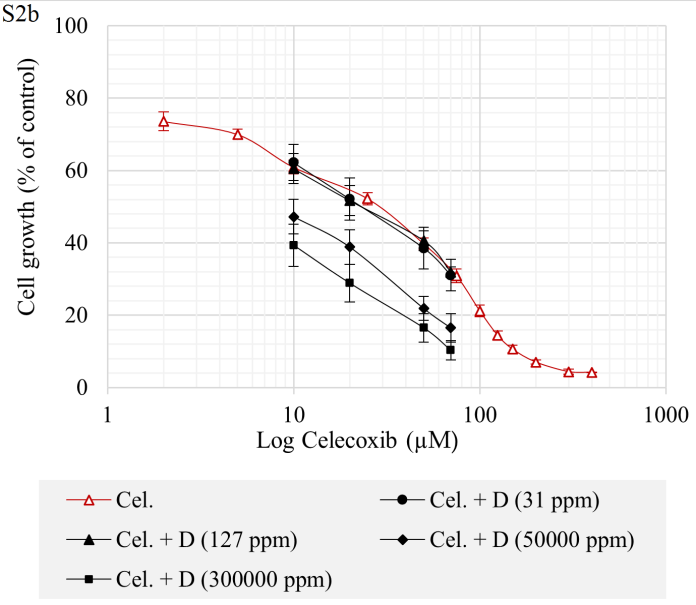


**
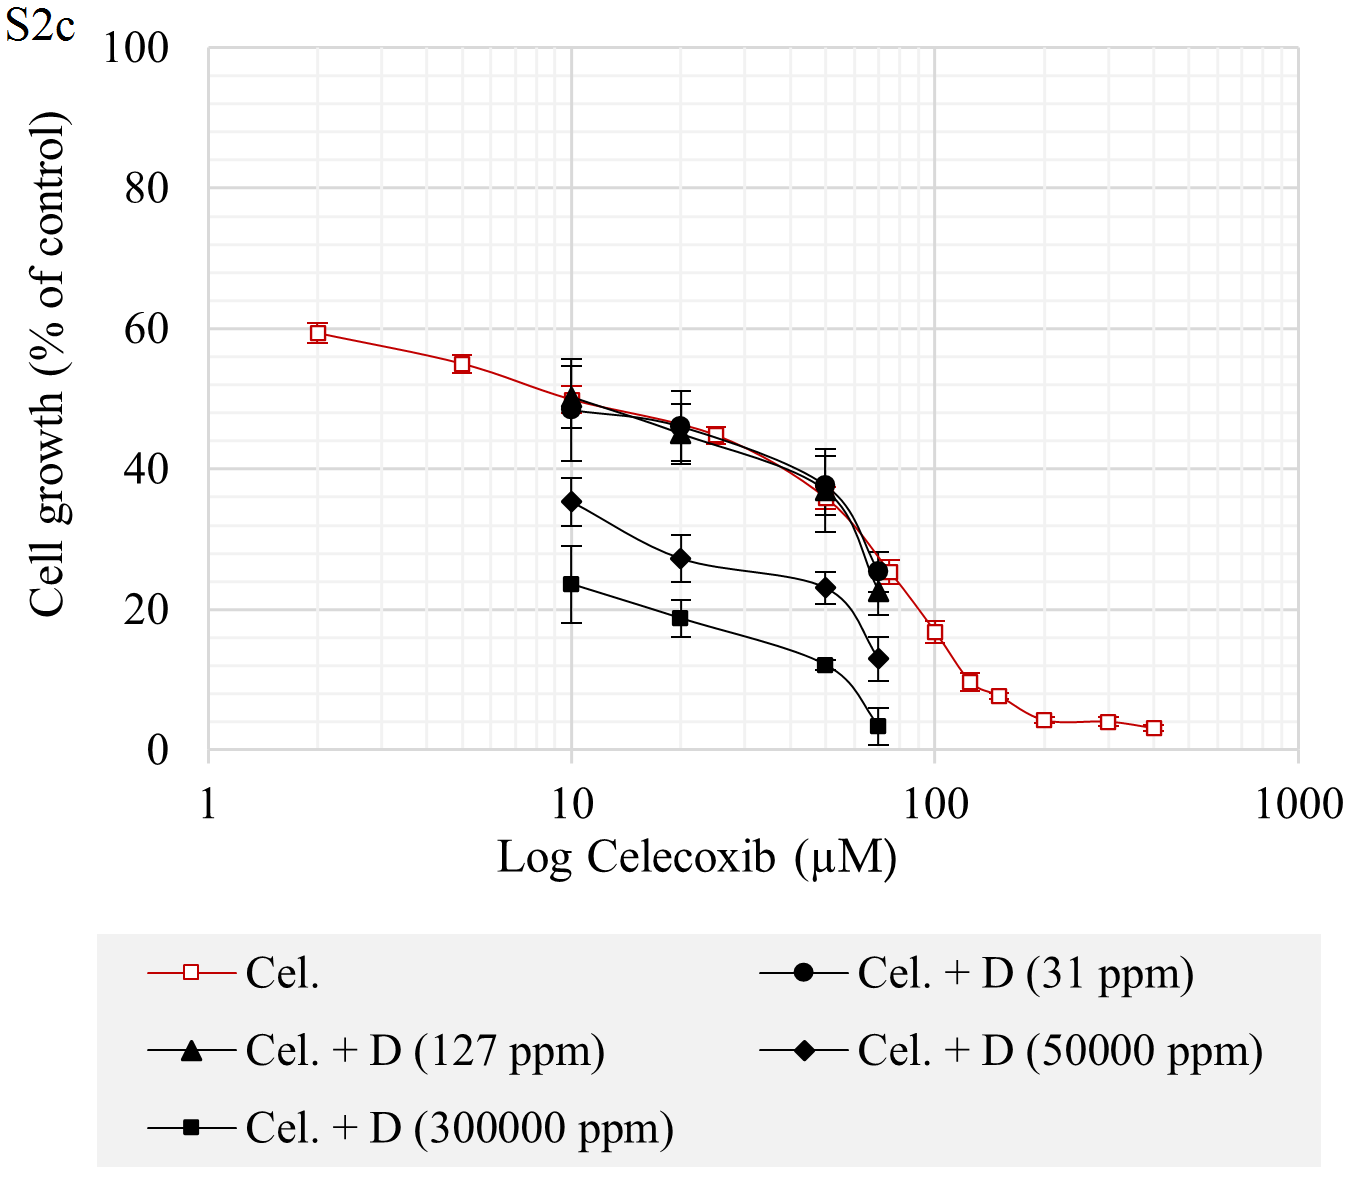
**

**Figure 3:** The (logarithmic) growth inhibitory effect of indomethacin in combination with DDWs and DEWs for 24 (a), 48 (b), and 72 (c) hours on the Hep G2 cell line.


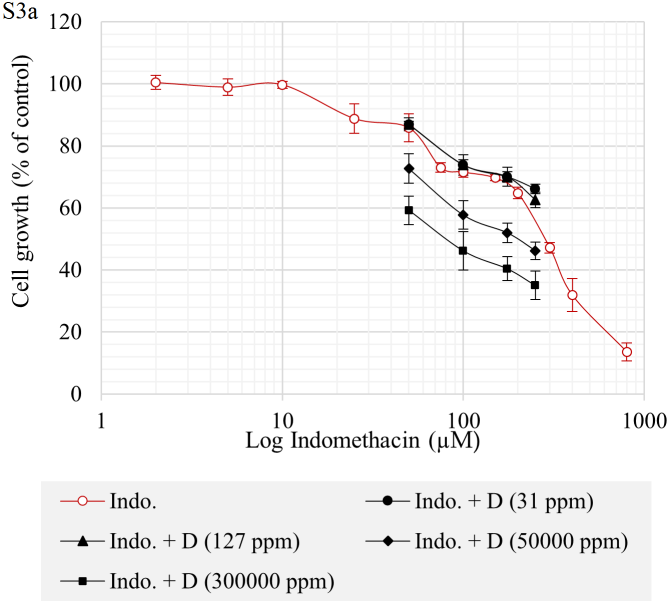

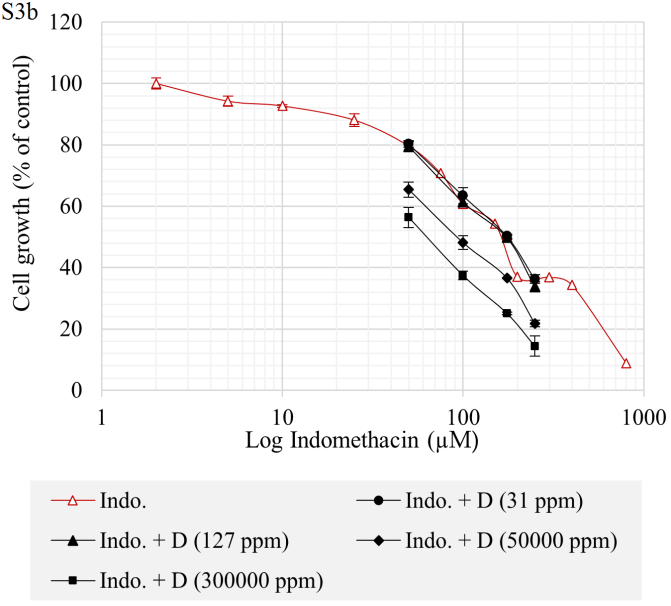

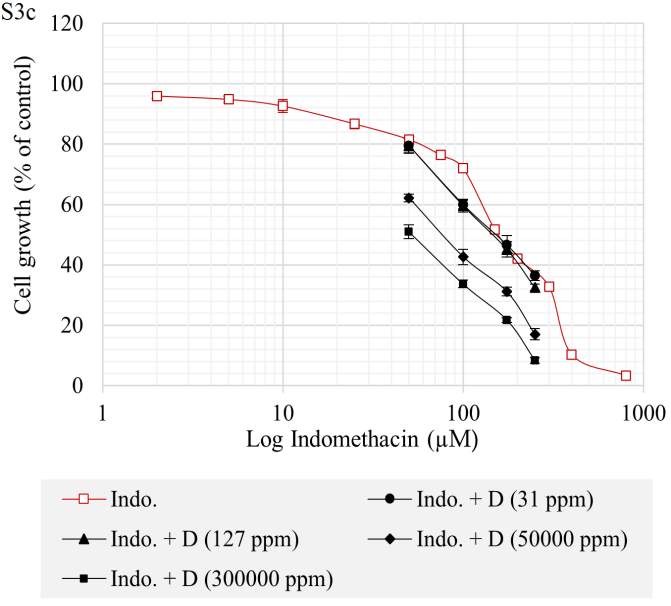

Supplement: Supplementary file 1 [file supplementary]
